# Supplementary material for: In vivo base editing of post-mitotic sensory cells
Source: Nat Commun. 2018 Jun 5;9:2184. doi: 10.1038/s41467-018-04580-3 (PMC5988727; doi:10.1038/s41467-018-04580-3)
Supplement: Supplementary file 1 — Supplementary Information [file 41467_2018_4580_MOESM1_ESM.pdf]

## **SUPPLEMENTARY INFORMATION**

### ***In Vivo* Base Editing of Post-Mitotic Sensory Cells**

Wei-Hsi Yeh, Hao Chiang, Holly A. Rees, Albert S. B. Edge, and David R. Liu

**Supplementary Figure 1.** C-to-T conversion efficiency at  $\beta$ -catenin codon 33 and corresponding Wnt activity.

**Supplementary Table 1.** The  $\beta$ -catenin S33-targeting sgRNA did not result in detectable off-target modification in murine cells.

**Supplementary Figure 2.** Untreated wild-type mice do not exhibit cellular reprogramming, supporting cell proliferation, or hair cell proliferation in the organ of Corti.

**Supplementary Figure 3.** Densitometry analysis of  $\beta$ -catenin western blots and RT-qPCR of Wnt-responsive genes.

**Supplementary Figure 4.** Localization of lipid-mediated protein delivery via intracochlear injection into the mouse inner ear.

**Supplementary Figure 5.** Uncropped scans of the western blots in Fig. 2b.

**Supplementary Note 1.** Sequences of proteins used in this study.

**Supplementary Note 2.** Sequences of oligonucleotides used in this study.

**Supplementary Table 2.** *P*-values of different treatment conditions in this study.

**Supplementary References**

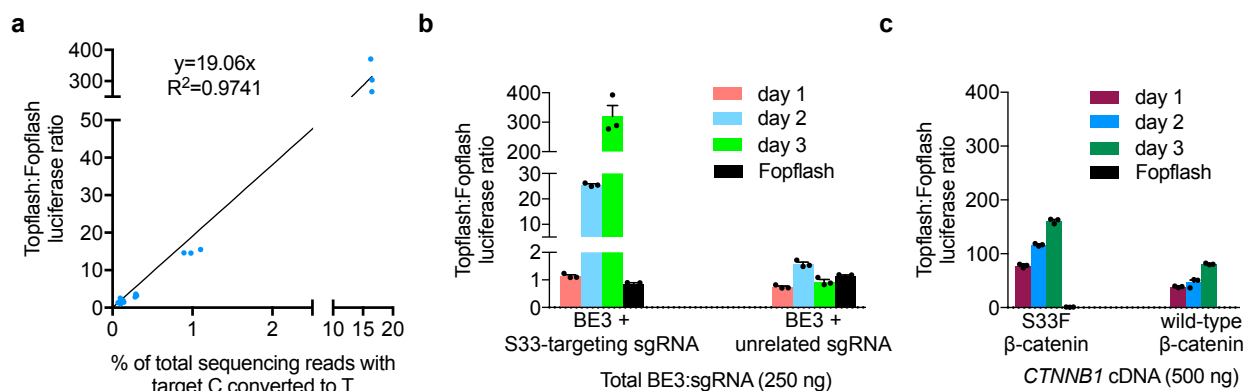

**Supplementary Figure 1.** C-to-T conversion efficiency at  $\beta$ -catenin codon 33 and corresponding Wnt activity. **(a)** The correlation between Wnt activity (Fig. 2c) and C-to-T conversion efficiency (Fig. 2d) in HEK293T cells. Linear regression analysis revealed a strong correlation with  $R^2 = 0.97$ . **(b, c)** Time course experiment measuring luciferase 1, 2, or 3 days after transfection with Topflash or Fopflash (a mutated negative control form of Topflash), Renilla reporter vectors, and either **(b)** BE3:sgRNA or **(c)** cDNA plasmid overexpressing F33  $\beta$ -catenin or S33  $\beta$ -catenin. Wnt signaling activation of TCF/LEF-mediated transcription was measured by relative luciferase activity (Topflash:Fopflash ratio), which corrects for transfection efficiencies. Values and error bars reflect mean  $\pm$  S.E.M. of three technical replicates performed on three different wells.

|           | 5'-Sequence-3'           | Mismatches (MMs) | UCSC gene     | Location       | Indels | GUIDE-seq |
|-----------|--------------------------|------------------|---------------|----------------|--------|-----------|
| On-Target | TTGGATTCTGGAATCCATTCTGG  | 0MMs             | <i>Ctnnb1</i> | chr9:120950619 | 22.59% | 1108      |
| MIT-1     | TTTGAATTCTGGAATCCATGCAAG | 2MMs             |               | chr1:138909020 | 0.04%  | 0         |
| MIT-2     | TTGAAATCTGGAATCCATTCCAG  | 2MMs             |               | chr6:53612810  | 0.02%  | 0         |
| MIT-3     | TTGGATCCTGGAATCCATGCTGA  | 2MMs             |               | chr4:148110266 | 0.02%  | 0         |
| MIT-4     | TTGGTTTCTGGAATCCACTCAGG  | 2MMs             |               | chrX:66244521  | 0.03%  | 0         |
| MIT-5     | GAGGATTCTGAATCCATTCTGA   | 3MMs             |               | chr10:58945312 | 0.02%  | 0         |
| CFD-1     | TGGGATATTAGAATCCATTCTGG  | 4MMs             |               | chr5:33711103  | 0.01%  | 0         |
| CFD-2     | GTGGGTTCTGGATCCATTCTGG   | 3MMs             |               | chr8:41900478  | 0.03%  | 0         |
| CFD-3     | TGGGGTTTAGAATCCATTCTGG   | 4MMs             |               | chr9:42831557  | 0.04%  | 0         |
| CFD-4     | TGGGATTGGGAATCAATTCAGG   | 4MMs             |               | chr11:80023506 | 0.03%  | 0         |
| CFD-5     | ATGGATTCTGGAGACCATTCTGG  | 3MMs             |               | chr7:114461205 | 0.02%  | 0         |

**Supplementary Table 1.** The  $\beta$ -catenin S33-targeting sgRNA did not result in detectable off-target modification in murine cells. No off-target modification was observed in NIH-3T3 cells by GUIDE-seq<sup>1</sup> following nucleofection of 1000 ng Cas9 plasmid and 300 ng S33-targeting sgRNA plasmid into murine NIH/3T3 cells using a LONZA 4D-Nucleofector. Potential off-target sites were also identified by computational prediction using CRISPOR<sup>2</sup>. Indels were assayed by HTS at the *Ctnnb1* on-target site and at each predicted off-target site. Mismatches are shown in red and PAMs are in blue. No significant off-target modification was observed either using GUIDE-seq or by high-throughput sequencing of potential off-target sites identified through two different computational prediction methods.

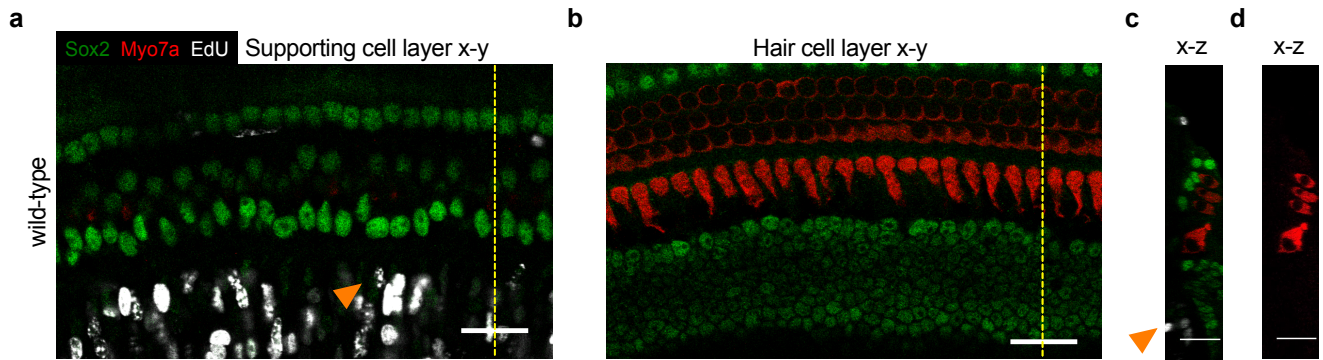

**Supplementary Figure 2.** Untreated wild-type mice do not exhibit cellular reprogramming, supporting cell proliferation, or hair cell proliferation in the organ of Corti. Postnatal day 2 (P2) mice received 5-ethynyl-2-deoxyuridine (EdU), which is incorporated into replicating cells, by subcutaneous injection once daily for 5 days. At postnatal day 7 (one day after the fifth EdU injection), cochlea were dissected and organ of Corti were visualized by chemical staining and immunofluorescence. In the cochlea, Myo7a (red) is expressed in hair cells and Sox2 (green) is expressed in supporting cells. EdU (white) was used to visualize newly divided cells. **(a, b)** No EdU incorporation was observed among Sox2-positive cells or among Myo7a-positive cells, suggesting no newly divided supporting cells or hair cells. EdU-positive cells were observed among other cell types (e.g., tympanic border cells, indicated by orange arrowheads in **a** and **c**). **(c, d)** An x-z plane image of (a) at the dotted yellow line, with (c) either all three channels (EdU, Myo7a, and Sox2) visualized, or (d) only Myo7a visualized. Scale bar (white) = 25 μm.

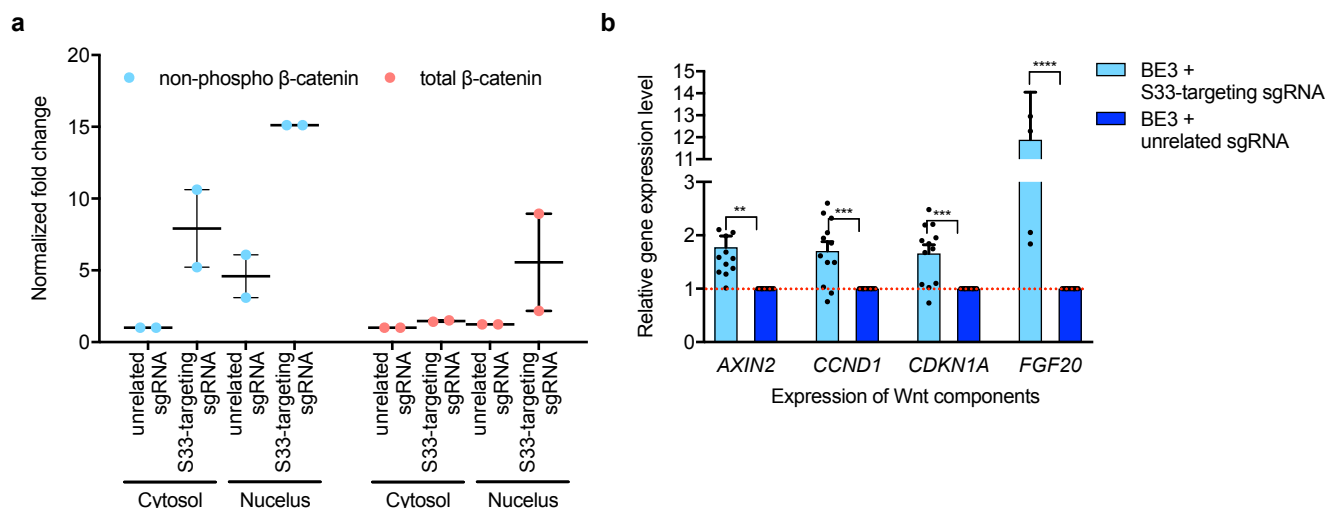

**Supplementary Figure 3.** Densitometry analysis of  $\beta$ -catenin western blots and RT-qPCR of Wnt-responsive genes. **(a)** HEK293T cells were treated with BE3 and S33-targeting sgRNA (BE3) or with unrelated sgRNA (control). Proteins extracted from each sample were separated into cytosolic and nuclear fractions. Expression levels were normalized to *GAPDH* (see Methods) and are expressed as fold change relative to control samples, which were treated with lipid only. Values and error bars reflect mean and range of two biological replicates performed on separate days. **(b)** RT-qPCR of Wnt target genes analyzed 3 days after transfection with BE3 + S33-targeting sgRNA in HEK293T cells. Fold changes were normalized to cells treated with BE3 + unrelated sgRNA. Values and error bars reflect mean  $\pm$  S.E.M. of 12 samples per bar treated in three different days. \*\*  $p \leq 0.01$ , \*\*\*  $p \leq 0.001$ , and \*\*\*\*  $p \leq 0.0001$  (Student's two tailed t-test).

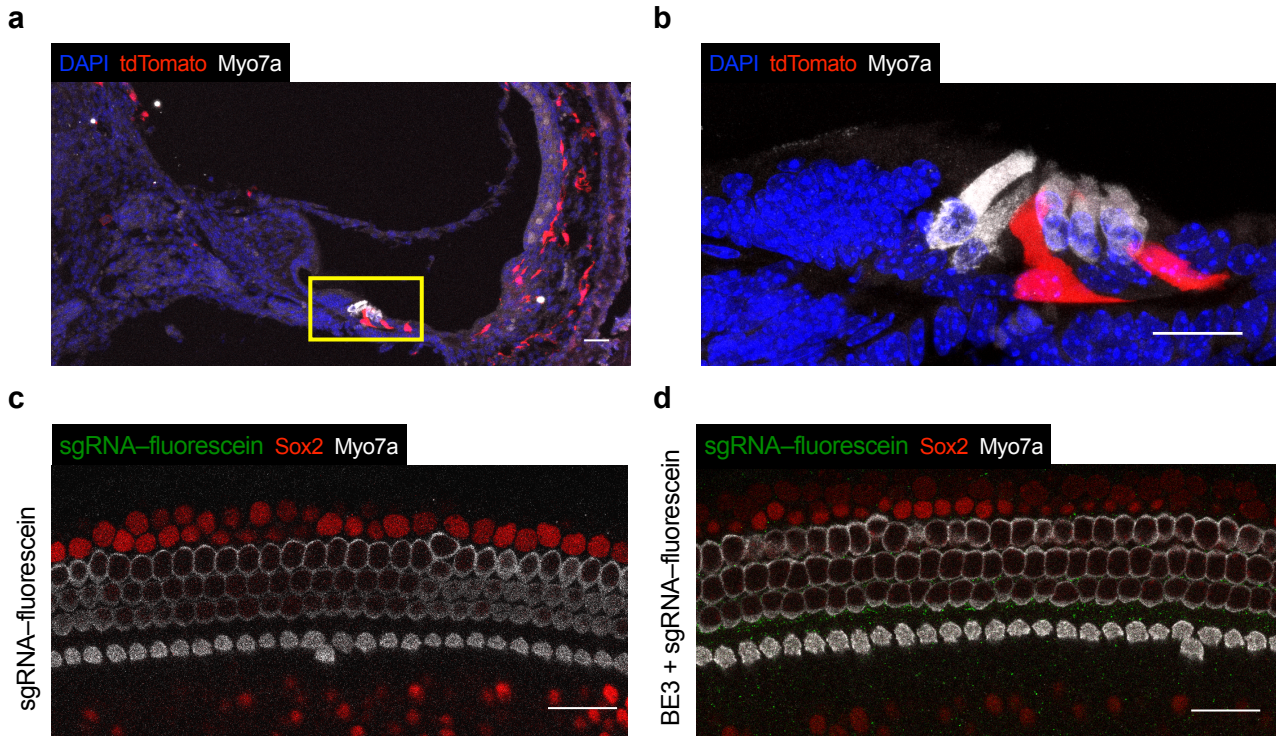

**Supplementary Figure 4.** Localization of lipid-mediated protein delivery via intracochlear injection into the mouse inner ear. (a, b) The cochlea of three postnatal day 1 (P1) mice were injected with cationic lipid (Lipofectamine 2000) complexed with (–30)GFP–Cre5,6. One day after injection, temporal bones containing the cochlea were dissected, fixed, cryoprotected with 30% sucrose, and sectioned. The organ of Corti was visualized by staining and fluorescence microscopy. A sectional view (See Fig. 4a) of one representative cochlea is shown, with Myo7a (white) denoting hair cells, DAPI (blue) denoting nuclei, and tdTomato (red) denoting Cre-mediated recombination. (a) The tdTomato signal was observed in the stria vascularis and the organ of Corti (yellow rectangle, magnified in (b)). (b) In the organ of Corti, the tdTomato signal is located in the supporting-cell region beneath the hair cells (white), demonstrating that Cre delivery is localized to the site of injection and enables targeting of supporting cells. Scale bars (white) = 20  $\mu$ m. (c, d) The cochleas of two wild-type P1 mice were injected with cationic lipid (Lipofectamine 2000) complexed with BE3 + fluorescein-labeled S33-targeting sgRNA. Two mice injected with lipid complexed with fluorescein-labeled S33-targeting sgRNA alone. Six hours after injection, the cochleas were dissected and the organ of Corti was visualized by staining and fluorescence microscopy. A top-down view of hair cell and supporting cell layer is shown. Myo7a (white) is expressed in hair cells, Sox2 (red) is expressed in supporting cells, and sgRNA–fluorescein is shown in green. (c) No fluorescein signal near Sox2-positive cells or Myo7a-positive cells was observed in cochlea treated with sgRNA–fluorescein alone, suggesting sgRNA alone is prone to degrade *in vivo*. (d) In contrast, fluorescein signal was observed in BE3 + sgRNA–fluorescein treated cochlea in regions of Sox2-positive cells and Myo7a-positive cells, suggesting localization of injected lipid:BE3:sgRNA complexes to these regions. Scale bars (white) = 25  $\mu$ m.

total  $\beta$ -catenin

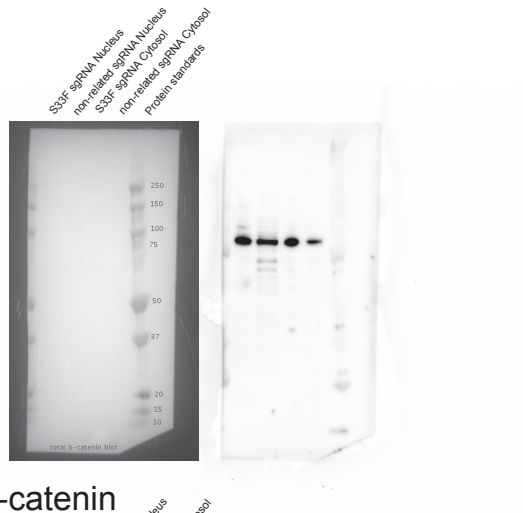

non-phospho  $\beta$ -catenin

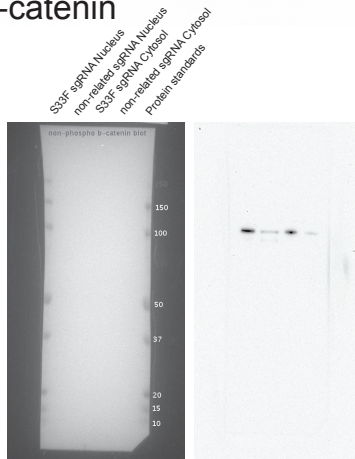

GAPDH

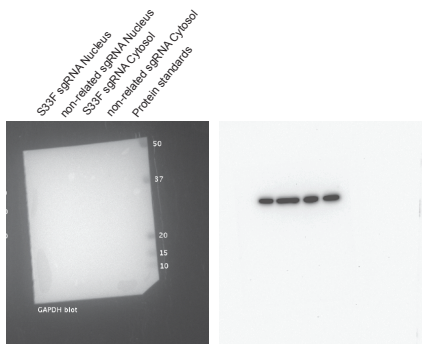

**Supplementary Figure 5.** Uncropped scans of the western blots in Fig. 2b. Bright field images (left) and images after exposure to ECL-Plus substrate (right) are shown after blotting with antibodies against total  $\beta$ -catenin (top), non-phospho  $\beta$ -catenin (middle), or GAPDH (bottom).

**Supplementary Note 1.** Sequences of proteins used in this study.

*BE3 protein sequence*<sup>3</sup>

MGSSHHHHHSSETGPVAVDPTLRRRIEPHEFEVFFDPRELKTCCLYEINWGGRHSIWRHTSQNTNKHVEV  
NFIEKFITTERYFCPNTRCSITWFLSWSPCGECSRAITEFLSRYPHVTLFYIARLYHHADPRNRQGLRDLISSGVTI  
QIMTEQESGYCWRNFVNYSNPSNEAHWPYPHLLWVRLYVLELYCIILGLPPCLNLRKQKQPLTFFTIALQSCHYQ  
RLPPHILWATGLKSGSETPGTSESATPESDKKYSIGLAIGTNSVGWAVITDEYKVPSKKFKVLGNTDRHSIKKLI  
GALLFDSGETAEATRLKRTARRRYTRRKNRICYLQEIFSNEMAKVDDSFHRLSEESFLVEEDKKHERHPIFGNIV  
DEVAYHEKYPTIYHLRKKLV DSTDKADLRLLIYLA LAHMIKFRGHFLIEGDLNPDNSDVKLFQILVQTYNQLFEENP  
INASGVDAKAILSARLSKSRLENLIAQLPGEKKNGFLGNLIALSLGLTPNFKSNFDLAEDAKLQLSKDTYDDDL  
NLLAQIGDQYADLFLAAKNLSDAILLSDILRVNTEITKAPLSASMIKRYDEHHQDLTLLKALVRQQLPEKYKEIFFDQ  
SKNGYAGYIDGGASQEEFYKFIKPILEKMDGTEELLVKLNREDLLRKQRTFDNGSIPHQIHLGELHAILRRQEDFY  
PFLKDNREKIEKILTFRIPIYVGPLARGNSRFAWMTRKSEETITPWNFEVVDKGASQSFIERMTNFDKNLPNE  
KVLPKHSLLEYFTVYNELTKVKYVTEGMRKPAFLSGEQKKAIVDLLFKTNRKVTVKQLKEDYFKKIECFDSVEIS  
GVEDRFNASLGTYHDLLKIIDKDFLDNEENEDILEDIVLTLTLFEDREMIEERLKYAHLFDDKVMKQLKRRRYTG  
WGRLSRKLINGIRDKQSGKTILDFLKSDGFANRNFMLIHDDSLTFKEDIQKAQVSGQGDSLHEHIANLAGSPA  
KGILQTVKVVDELVKVMGRHKPENIVIMARENQTTQKGQKNSRERMKRIE EGIKELGSQILKEHPVENTQLQNE  
KLYLYYLQNGRDMYVDQELDINRLSDYDVHIVPQSFLKDDSIDNKVLTRSDKNRGKSDNVPSEEVVKKMKNYW  
RQLLNAKLITQRKFDNLTKAERGGLSELDKAGFIKRLVETRQITKHVAQILDSRMNTKYDENDKLIREVKVITLKS  
KLVSDFRKDFQFYKVRINNYYHHAHDAYLNAVVG TALIKKYPKLESEFVYGDYKVYDVRKMIKSEQEIGKATAK  
YFFYSNIMNFFKTEITLANGEIRKRPLIETNGETGEIVWDKGRDFATVRKVL SMPQVNIVKKTEVQTGGFSKESILP  
KRNSDKLIARKKDWDPKKYGGFDSPTVAYSVLVAKVEKGKSKKLKSVKELLGITIMERSSSF EKNPIDFLEAKGY  
KEVKKDLIIKLPKYSLFELENGRKRMLASAGELQKGNELALPSKYVNFLYLASHYEKLGSPEDNEQKQLFVEQH  
KHYLDEIIEQISEFSKRVLADANLDKVL SAYNKH RDKPIREQAENIIHLFTLTNLGAPAAF KYFDTTIDRKRYTSTKE  
VL DATLIHQ SITGLYETRIDLSQLGGDSGGSTNLSDIIEKETGKQLVIQESILMLPEEVEEVIGNKPESDILVHTAYD  
ESTDENVMLLTSDAPEYKPWALVIQDSNGENKIKMLSGGSPKKKRKV

## Supplementary Note 2. Sequences of oligonucleotides used in this study.

### *Primers used to amplify off-target genomic DNA for HTS in mouse cells*

|                             |                                                             |
|-----------------------------|-------------------------------------------------------------|
| fwd_Ctnnb1_off_target_MIT_1 | ACACTCTTTCCCTACACGACGCTCTTCCGATCTNNNNCTTGTTTCATGCTGTCGCTG   |
| rev_Ctnnb1_off_target_MIT_1 | TGGAGTTCAGACGTGTGCTCTTCCGATCTTGGGTCATATGCGGGTATG            |
| fwd_Ctnnb1_off_target_MIT_2 | ACACTCTTTCCCTACACGACGCTCTTCCGATCTNNNNGTGTTCTGAGAACACACCCTG  |
| rev_Ctnnb1_off_target_MIT_2 | TGGAGTTCAGACGTGTGCTCTTCCGATCTTAATGTCAGCCAGAGCCTC            |
| fwd_Ctnnb1_off_target_MIT_3 | ACACTCTTTCCCTACACGACGCTCTTCCGATCTNNNNGTGTCTGCAGAAGTCAAGG    |
| rev_Ctnnb1_off_target_MIT_3 | TGGAGTTCAGACGTGTGCTCTTCCGATCTCTACAGGACTCTTCAGAGGA           |
| fwd_Ctnnb1_off_target_MIT_4 | ACACTCTTTCCCTACACGACGCTCTTCCGATCTNNNNCAGAGGTGTCAAATTCCTCC   |
| rev_Ctnnb1_off_target_MIT_4 | TGGAGTTCAGACGTGTGCTCTTCCGATCTTCAGTGATTGAGTCTTGCCC           |
| fwd_Ctnnb1_off_target_MIT_5 | ACACTCTTTCCCTACACGACGCTCTTCCGATCTNNNNGTCTCAGTTCCACAGATTC    |
| rev_Ctnnb1_off_target_MIT_5 | TGGAGTTCAGACGTGTGCTCTTCCGATCTTCTGTTTCATGGCCAGCTTGA          |
| fwd_Ctnnb1_off_target_CFD_1 | ACACTCTTTCCCTACACGACGCTCTTCCGATCTNNNNAAACCATAGGAGGAGAGTGC   |
| rev_Ctnnb1_off_target_CFD_1 | TGGAGTTCAGACGTGTGCTCTTCCGATCTGGTGCAGAAGTATAGGGAAG           |
| fwd_Ctnnb1_off_target_CFD_2 | ACACTCTTTCCCTACACGACGCTCTTCCGATCTNNNNCAACTGATAAGACTTGCCTTGC |
| rev_Ctnnb1_off_target_CFD_2 | TGGAGTTCAGACGTGTGCTCTTCCGATCTCAAGAAAAAGTGTGTTTGAGGGC        |
| fwd_Ctnnb1_off_target_CFD_3 | ACACTCTTTCCCTACACGACGCTCTTCCGATCTNNNNTAGTTCAAGCTGGTCTGTGG   |
| rev_Ctnnb1_off_target_CFD_3 | TGGAGTTCAGACGTGTGCTCTTCCGATCTATCTGTGCTTCAGAGCTACC           |
| fwd_Ctnnb1_off_target_CFD_4 | ACACTCTTTCCCTACACGACGCTCTTCCGATCTNNNNATCCAAGATCCCTAGGAACC   |
| rev_Ctnnb1_off_target_CFD_4 | TGGAGTTCAGACGTGTGCTCTTCCGATCTAAAGATGAGGTGTGTGTGGC           |
| fwd_Ctnnb1_off_target_CFD_5 | ACACTCTTTCCCTACACGACGCTCTTCCGATCTNNNNCTTCCCATCTCCTTAGCTCTG  |
| rev_Ctnnb1_off_target_CFD_5 | TGGAGTTCAGACGTGTGCTCTTCCGATCTTGTGAAGAATATTAGGGGCAGGG        |

### *Primers used to amplify on-target genomic DNA for HTS*

|                      |                                                              |
|----------------------|--------------------------------------------------------------|
| fwd_CTNNB1_on_target | ACACTCTTTCCCTACACGACGCTCTTCCGATCTNNNNATTTGATGGAGTTGGACATGGCC |
| rev_CTNNB1_on_target | TGGAGTTCAGACGTGTGCTCTTCCGATCTCCAGCTACTTGTTCTTGAGTGAAGG       |
| fwd_Ctnnb1_on_target | ACACTCTTTCCCTACACGACGCTCTTCCGATCTNNNNTGAGCCGGACAGAAAAGC      |
| rev_Ctnnb1_on_target | TGGAGTTCAGACGTGTGCTCTTCCGATCTTCTTCCTCAGGGTTGCCC              |

### *Primers used for generating PCR products prior to T7 RNAP transcription of sgRNAs*

|                                 |                          |
|---------------------------------|--------------------------|
| rev_sgRNA_T7: used in all cases | AAAAAAGCACCGACTCGGTGCCAC |
|---------------------------------|--------------------------|

|                     |                                                              |
|---------------------|--------------------------------------------------------------|
| fwd_sgRNA_T7_Ctnnb1 | TAATACGACTCACTATAGGTTGGATTCTGGAATCCATTTGTTTTAGAGCTAGAAATAGCA |
| fwd_sgRNA_T7_CTNNB1 | TAATACGACTCACTATAGGCTGGACTCTGGAATCCATTCGTTTTAGAGCTAGAAATAGCA |

### *Primers used for generating sgRNA transfection plasmids*

The pFYF1320 plasmid was used as template as previously described<sup>4</sup>. The sequence of other sgRNA plasmids was previously reported

|                   |                                                         |
|-------------------|---------------------------------------------------------|
| rev_sgRNA_plasmid | GGTGTTCGTCCTTTCCACAAG                                   |
| fwd_CTNNB1        | GAATGGATTCCAGAGTCCAGGTTTTAGAGCTAGAAATAGCAAGTTAAAATAAGGC |
| fwd_Ctnnb1        | TTGGATTCTGGAATCCATTCGTTTTAGAGCTAGAAATAGCAAGTTAAAATAAGGC |

### *Sequences of DNA strands for in vitro deaminase assays*

|                      |                                                                |
|----------------------|----------------------------------------------------------------|
| fwd_Ctnnb1_substrate | ACGTAAACGGCCACAA TACTTGGATTCTGGAATCCATTCTGG GCATCTTCTTCAAGGACG |
| rev_Ctnnb1_substrate | CGTCCTTGAAGAAGATGC CCAGAATGGATTCCAGAATCCAAGTA TTGTGGCCGTTTACGT |

| P values (student's two-tailed t-test) for comparisons between listed treatments |                                                                        |                   |                  |              |         |
|----------------------------------------------------------------------------------|------------------------------------------------------------------------|-------------------|------------------|--------------|---------|
|                                                                                  |                                                                        | Specificity ratio | Top/Fop activity | Base-editing | Signif. |
| Fig. 1d                                                                          | plasmid CORRECT HDR vs BE3                                             | <0.0001           |                  |              | ****    |
| Fig. 2a                                                                          | plasmid wild-type CTNNB1 vs plasmid mutant CTNNB1                      |                   | <0.0001          |              | ****    |
| Fig. 2c                                                                          | plasmid BE3:S33F sgRNA (62.5 ng) vs BE3:unrelated sgRNA (1000 ng)      |                   | 0.1166           |              | ns      |
| Fig. 2c                                                                          | plasmid BE3:S33F sgRNA (125 ng) vs BE3:unrelated sgRNA sgRNA (1000 ng) |                   | 0.0346           |              | *       |
| Fig. 2c                                                                          | plasmid BE3:S33F sgRNA (250 ng) vs BE3:unrelated sgRNA sgRNA (1000 ng) |                   | 0.0006           |              | ***     |
| Fig. 2c                                                                          | plasmid BE3:S33F sgRNA (500 ng) vs BE3:unrelated sgRNA sgRNA (1000 ng) |                   | <0.0001          |              | ****    |
| Fig. 2c                                                                          | plasmid BE3:S33F sgRNA (1000 ng) vs BE3:unrelated sgRNA (1000 ng)      |                   | 0.0005           |              | ***     |
| Fig. 2d                                                                          | plasmid BE3:S33F sgRNA (62.5 ng) vs BE3:unrelated sgRNA (1000 ng)      |                   |                  | 0.0037       | **      |
| Fig. 2d                                                                          | plasmid BE3:S33F sgRNA (125 ng) vs BE3:unrelated sgRNA (1000 ng)       |                   |                  | 0.0023       | **      |
| Fig. 2d                                                                          | plasmid BE3:S33F sgRNA (250 ng) vs BE3:unrelated sgRNA (1000 ng)       |                   |                  | <0.0001      | ****    |
| Fig. 2d                                                                          | plasmid BE3:S33F sgRNA (500 ng) vs BE3:unrelated sgRNA (1000 ng)       |                   |                  | <0.0001      | ****    |
| Fig. 2d                                                                          | plasmid BE3:S33F sgRNA (1000 ng) vs BE3:unrelated sgRNA (1000 ng)      |                   |                  | <0.0001      | ****    |
| Fig. 3d                                                                          | RNP CORRECT HDR vs BE3                                                 | 0.0009            |                  |              | ***     |

**Supplementary Table 2.** *P*-values of different treatment conditions in this study. *P*-values were calculated using the Student's two tailed t-test as described in the Methods section. ns =  $p > 0.05$ , \*  $p \leq 0.05$ , \*\*  $p \leq 0.01$ , \*\*\*  $p \leq 0.001$ , and \*\*\*\*  $p \leq 0.0001$ .

## Supplementary References

1. Tsai, S. Q. et al. GUIDE-seq enables genome-wide profiling of off-target cleavage by CRISPR-Cas nucleases. *Nature biotechnology* **33**, 187-197, doi:10.1038/nbt.3117 (2015).
2. Haeussler, M. et al. Evaluation of off-target and on-target scoring algorithms and integration into the guide RNA selection tool CRISPOR. *Genome Biology* **17**, 148 (2016).
3. Rees, H.A. et al. Improving the DNA specificity and applicability of base editing through protein engineering and protein delivery. *Nature Communications* **8**, 15790 (2017).
4. Komor, A.C., Kim, Y.B., Packer, M.S., Zuris, J.A. & Liu, D.R. Programmable editing of a target base in genomic DNA without double-stranded DNA cleavage. *Nature* **533**, 420-424 (2016).
